# Supplementary material for: Genomic Changes within a Subset of IncI2 Plasmids Associated with Dissemination of mcr-1 Genes and Other Important Antimicrobial Resistance Determinants
Source: MDPI journal article supplement (doi:10.3390/antibiotics11020181), 2022-01-29
Supplement: s1 [file s1]

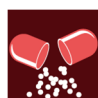

## Supplementary Material

Supplemental Table S1: Metadata file – plasmids are listed in the same order as Figure 2.

| Name                   | Country | Host   | isolation source | Collection | Organism                                                   | ISEScan | mcr | AMR        |
|------------------------|---------|--------|------------------|------------|------------------------------------------------------------|---------|-----|------------|
| AP002527               | UK      | human  | urine            | 1972       | Escherichia coli                                           | IS3     |     | aadA, dfrA |
| SRR3360194             | US      | human  | feces            | 2010       | Escherichia coli O103:H2                                   |         |     |            |
| 1505159pSL<br>y51      | US      | dairy  |                  |            | Salmonella enterica<br>Kentucky                            |         |     |            |
| SRR6782557<br>_21_1143 | US      | human  | feces            | 2018       | Salmonella enterica<br>subsp. enterica serovar<br>Muenchen |         |     |            |
| SRR4190249<br>_21_1143 | US      |        | feces            | 2016       | Salmonella enterica<br>subsp. enterica serovar<br>Newport  |         |     |            |
| SRR5951434<br>_16_1143 | US      | human  | urine            | 2017       | Salmonella enterica<br>subsp. enterica serovar<br>Newport  |         |     |            |
| SRR5360994<br>_18_1143 | US      |        | feces            | 2014       | Salmonella enterica<br>subsp. enterica serovar<br>Berta    |         |     |            |
| 1502178pSL<br>y41      | US      | bovine |                  |            | Salmonella enterica<br>Anatum                              |         |     |            |
| SRR1609871<br>_repA_   | US      | human  |                  | 2014       | Escherichia coli                                           |         |     |            |
| SRR1649236             | US      | human  |                  | 2014       | Escherichia coli                                           |         |     |            |
| SRR1649237             | US      | human  |                  | 2014       | Escherichia coli                                           |         |     |            |
| SRR2102959             | US      | human  | feces            |            | Escherichia coli O157:H7                                   |         |     |            |

|            |    |       |                  |      |                                        |      |  |  |
|------------|----|-------|------------------|------|----------------------------------------|------|--|--|
| SRR3371805 |    |       |                  |      |                                        |      |  |  |
| _reve      | US | human | feces            |      | Escherichia coli O157:H7               |      |  |  |
| SRR6984543 |    |       |                  |      |                                        |      |  |  |
| _16_1143   | US |       |                  |      | Salmonella enterica                    | IS66 |  |  |
| SRR5956473 |    |       |                  |      | Salmonella enterica                    |      |  |  |
| _16_1143   | US | swine | retail           | 2017 | subsp. enterica serovar<br>Muenster    |      |  |  |
| SRR5573844 |    |       |                  |      |                                        |      |  |  |
| _12_1143   | US |       |                  |      | Salmonella enterica                    |      |  |  |
| SRR5588547 |    |       |                  |      | Salmonella enterica                    |      |  |  |
| _11_1143   | US | human | feces            | 2017 | subsp. enterica serovar<br>Enteritidis |      |  |  |
| SRR5640204 |    |       |                  |      | Salmonella enterica                    |      |  |  |
| _24_1143   | US | human | peritoneal fluid | 2017 | subsp. enterica serovar<br>Enteritidis |      |  |  |
| SRR5714218 |    |       |                  |      |                                        |      |  |  |
| _11_1143   | US |       |                  |      | Salmonella enterica                    |      |  |  |
| SRR5605933 |    |       |                  |      |                                        |      |  |  |
| _12_1143   | US | human | feces            | 2017 | Salmonella enterica                    | IS3  |  |  |
| SRR5962606 |    |       |                  |      | Salmonella enterica                    |      |  |  |
| _23_1143   | US | human | feces            | 2017 | subsp. enterica serovar<br>Montevideo  |      |  |  |
| SRR7346618 |    |       |                  |      |                                        |      |  |  |
| _19_1143   | US | human | feces            | 2018 | Salmonella enterica                    |      |  |  |
| SRR1967295 |    |       |                  |      | Salmonella enterica                    |      |  |  |
| _26_1143   | UK | human |                  | 2014 | subsp. enterica serovar<br>Typhimurium |      |  |  |

|                        |    |       |       |      |                                                                |  |  |  |
|------------------------|----|-------|-------|------|----------------------------------------------------------------|--|--|--|
| SRR6050764<br>_26_1143 | US |       |       |      | Salmonella enterica                                            |  |  |  |
| SRR5680619<br>_26_1143 | US | human | feces | 2017 | Salmonella enterica<br>subsp. enterica serovar<br>Java         |  |  |  |
| SRR5832666<br>_25_1143 | US |       |       |      | Salmonella enterica                                            |  |  |  |
| SRR3175501<br>_reve    | US | human | feces | 2015 | Escherichia coli O157:H7                                       |  |  |  |
| SRR6327035<br>_23_1143 | US | human | feces | 2017 | Salmonella enterica<br>subsp. enterica serovar<br>4,[5],12:i:- |  |  |  |
| SRR3392876<br>_12_1143 | US |       |       |      | Salmonella enterica                                            |  |  |  |
| SRR7441947<br>_21_1143 | US |       |       |      | Salmonella enterica                                            |  |  |  |
| SRR7257603<br>_27_1143 | US | beef  |       | 2018 | Salmonella enterica<br>subsp. enterica serovar<br>Give         |  |  |  |
| SRR7269367<br>_20_1143 | US |       |       |      | Salmonella enterica                                            |  |  |  |
| SRR2014869<br>_reve    | US | human |       | 2012 | Escherichia species<br>O174:H2                                 |  |  |  |
| SRR6366332<br>_24_1143 | US | human | feces | 2017 | Salmonella enterica<br>subsp. enterica serovar<br>4,[5],12:i:- |  |  |  |

|            |         |        |       |      |                          |  |  |  |
|------------|---------|--------|-------|------|--------------------------|--|--|--|
| SRR3180709 |         |        |       |      |                          |  |  |  |
| _repA_     | US      | human  | feces | 2009 | Escherichia coli O157:H7 |  |  |  |
| SRR3146217 | US      | human  | feces | 2016 | Escherichia coli STEC    |  |  |  |
| SRR3180504 |         |        |       |      |                          |  |  |  |
| _reve      | US      | human  | feces | 2007 | Escherichia coli O157:H7 |  |  |  |
| SRR3371821 |         |        |       |      |                          |  |  |  |
| _reve      | US      | human  | feces | 2007 | Escherichia coli O157:H7 |  |  |  |
| SRR3185634 |         |        |       |      |                          |  |  |  |
| _repA_     | US      | human  |       |      | Escherichia coli         |  |  |  |
| CP010220   | China   | mouse  | feces | 2014 | Escherichia coli         |  |  |  |
|            |         |        |       |      | Salmonella enterica      |  |  |  |
| CP011291   | Germany |        |       | 2015 | subsp diarizonae         |  |  |  |
|            |         |        |       |      | Salmonella enterica      |  |  |  |
| CP011294   | Germany |        |       | 2015 | subsp diarizonae         |  |  |  |
| 1501839pSL |         |        |       |      |                          |  |  |  |
| y31        | US      | bovine |       |      | Escherichia coli         |  |  |  |
| SRR3371785 |         |        |       |      |                          |  |  |  |
| _reve      | US      | human  | feces | 2010 | Escherichia coli         |  |  |  |
| SRR3371794 |         |        |       |      |                          |  |  |  |
| _reve      | US      | human  | feces | 2010 | Escherichia coli         |  |  |  |
| SRR3180502 | US      | human  |       |      | Escherichia coli O157:H7 |  |  |  |
| SRR3158846 |         |        |       |      |                          |  |  |  |
| _reve      | US      | human  | feces | 2006 | Escherichia coli O157:H7 |  |  |  |
| SRR3371826 |         |        |       |      |                          |  |  |  |
| _repA_     | US      | human  | feces | 2007 | Escherichia coli O157:H7 |  |  |  |
| SRR1999996 | US      | human  |       |      | Escherichia coli         |  |  |  |

|                        |             |       |       |      |                                                                |                       |               |  |
|------------------------|-------------|-------|-------|------|----------------------------------------------------------------|-----------------------|---------------|--|
| SRR3231644<br>_reve    | US          | human |       |      | Escherichia coli                                               |                       |               |  |
| SRR5586308<br>_16_1143 | US          | human | feces | 2016 | Salmonella enterica<br>subsp. enterica serovar<br>Enteritidis  |                       |               |  |
| SRR6249662<br>_23_1143 | US          | human | feces | 2017 | Salmonella enterica<br>subsp. enterica serovar<br>4,[5],12:b:- |                       |               |  |
| CP009581               | Netherlands |       |       | 2014 | Escherichia coli                                               | IS200/IS60<br>5       |               |  |
| SRR3180493             | US          | human |       |      | Escherichia coli                                               |                       |               |  |
| SRR1966743<br>_30_1143 | UK          | human |       | 2014 | Salmonella enterica<br>subsp. enterica serovar<br>Stanley      | IS200/IS60<br>5       |               |  |
| SRR3158842<br>_repA_   | US          | human | feces | 2007 | Escherichia coli<br>O157:NM                                    |                       |               |  |
| SRR3394636<br>_reve    | US          | human | feces | 2016 | Escherichia coli O157:H7                                       |                       |               |  |
| SRR5832668<br>_23_1143 | US          |       |       |      | Salmonella enterica                                            |                       |               |  |
| SRR3180470<br>_repA_   | US          | human | feces | 2013 | Escherichia coli<br>O121:H19                                   |                       |               |  |
| SRR5364973<br>_13_1143 | US          | human | feces | 2017 | Salmonella enterica                                            |                       |               |  |
| CP015913               | US          | swine | cecum | 2016 | Escherichia coli                                               | IS200/IS60<br>5, IS91 | mcr-<br>1.1_1 |  |

|                        |    |        |           |      |                                                               |                 |  |  |
|------------------------|----|--------|-----------|------|---------------------------------------------------------------|-----------------|--|--|
| SRR7442230<br>_18_1143 | US |        |           |      | Salmonella enterica                                           |                 |  |  |
| SRR7221396<br>_30_1143 | UK | human  |           | 2018 | Salmonella enterica<br>subsp. enterica serovar<br>Typhimurium | IS200/IS60<br>5 |  |  |
| 1605825pSL<br>y61      | US | dairy  |           |      | Salmonella enterica<br>Cerro                                  |                 |  |  |
| SRR6310306<br>_26_1143 | US |        |           |      | Salmonella enterica                                           |                 |  |  |
| SRR6663430<br>_27_1143 | US |        | feces     | 2018 | Salmonella enterica<br>subsp. enterica serovar<br>Typhimurium |                 |  |  |
| SRR1266066<br>_12_1143 | US | bird   | composite | 2008 | Salmonella enterica<br>subsp. enterica serovar<br>Newport     | IS200/IS60<br>5 |  |  |
| SRR1609691<br>_18_1143 | US | turkey | retail    | 2005 | Salmonella enterica<br>subsp. enterica serovar<br>Muenster    |                 |  |  |
| SRR1946958<br>_20_1143 | US | turkey | retail    | 2007 | Salmonella enterica<br>subsp. enterica serovar<br>Heidelberg  |                 |  |  |
| SRR2648198<br>_14_1143 | US | turkey | retail    | 2008 | Salmonella enterica<br>subsp. enterica serovar<br>Newport     | IS200/IS60<br>5 |  |  |
| SRR6897879<br>_21_1143 | UK | human  |           | 2016 | Salmonella enterica<br>subsp. enterica serovar<br>Enteritidis |                 |  |  |

|            |       |         |       |      |                       |                      |  |                                               |
|------------|-------|---------|-------|------|-----------------------|----------------------|--|-----------------------------------------------|
| SRR2481391 |       |         |       |      |                       |                      |  |                                               |
| _reve      | US    | human   | feces | 2015 | Shigella sonnei       |                      |  |                                               |
| CP011645   | UK    |         |       | 2015 | Klebsiella pneumoniae | IS1182,<br>IS21      |  | KPC-3, aac(6')-<br>Ib, aadA, OXA-<br>9, TEM-1 |
| CP011978   | US    |         |       |      | Klebsiella pneumoniae | IS1182,<br>IS21      |  | KPC-3, aac(6')-<br>Ib, aadA, OXA-<br>9, TEM-1 |
| CP021546   |       |         |       |      | Klebsiella pneumoniae | IS1182,<br>IS21      |  | KPC-3, TEM-1                                  |
| CP021754   |       |         |       |      | Klebsiella pneumoniae | IS1182,<br>IS21      |  | KPC-3, TEM-1                                  |
| CP021861   |       |         |       |      | Klebsiella pneumoniae | IS21, IS91           |  | KPC-3, aac(6')-<br>Ib, aadA, OXA-<br>9, TEM-1 |
| KC845573   | US    | human   |       | 2005 | Klebsiella pneumoniae | IS1182,<br>IS21      |  | KPC-3, aac(6')-<br>Ib, aadA, OXA-<br>9, TEM-1 |
| JN797501   | China | dog     | feces | 2008 | Escherichia coli      | IS1380               |  | blaCTX-M-<br>55_1                             |
| KX827311   | China |         |       |      | Shigella sonnei       | IS1380               |  | blaCTX-M-<br>55_1                             |
| KF601686   | China | chicken |       | 2006 | Escherichia coli      | IS1380, IS3,<br>IS91 |  | blaCTX-M-<br>15_1                             |
| KJ020576   | China | chicken | feces | 2011 | Escherichia coli      | IS1380               |  | blaCTX-M-<br>64_1                             |

|                    |           |         |       |      |                                                         |                   |           |                |
|--------------------|-----------|---------|-------|------|---------------------------------------------------------|-------------------|-----------|----------------|
| KJ460501           | China     | human   |       | 2013 | Shigella sonnei                                         | IS1380            |           | blaCTX-M-55_1  |
| KM207012           | China     | human   |       | 2013 | Escherichia coli                                        | IS1380            |           | blaCTX-M-132_1 |
| KP091735           | China     | chicken |       | 2013 | Escherichia coli                                        | IS1380            |           | blaCTX-M-64_1  |
| KP198615           | China     | swine   |       | 2012 | Escherichia coli                                        | IS1380            |           | blaCTX-M-132_1 |
| KX034083           | China     | chicken | feces | 2012 | Escherichia coli                                        | IS1380, IS3, IS30 | mcr-1.1_1 | blaCTX-M-55_1  |
| KY012275           |           |         |       |      | Escherichia coli                                        | IS1380, IS30      | mcr-1.1_1 | blaCTX-M-55_1  |
| LN623683           | China     | human   |       | 2008 | Salmonella enterica                                     | IS1380            |           | blaCTX-M-55_1  |
| SRR1999886         | US        | human   |       |      | Escherichia coli                                        |                   |           |                |
| SRR7191870_25_1143 | UK        | human   |       | 2017 | Salmonella enterica subsp. enterica serovar Typhimurium |                   |           |                |
| CP019690           | Hungary   | human   | feces | 2002 | Shigella sonnei                                         |                   |           |                |
| SRR3180701         | US        | human   | feces | 2015 | Escherichia coli O145:H34                               |                   |           |                |
| SRR7027940_15_1143 | US        |         |       |      | Salmonella enterica                                     | IS3               |           |                |
| MG598816           | Argentina |         | urine |      | Escherichia coli                                        |                   | mcr-1.1_1 |                |



|                        |           |        |       |      |                                                               |                       |               |  |
|------------------------|-----------|--------|-------|------|---------------------------------------------------------------|-----------------------|---------------|--|
| SRR5220264<br>_29_1143 | UK        | human  |       | 2016 | Salmonella enterica<br>subsp. enterica serovar<br>Enteritidis | IS200/IS60<br>5, IS91 |               |  |
| MG594800               | Argentina |        | urine |      | Escherichia coli                                              |                       | mcr-<br>1.1_1 |  |
| SRR1649548<br>_14_1143 | US        | equine | feces | 2004 | Salmonella enterica<br>subsp. enterica serovar<br>Newport     |                       |               |  |
| SRR6919179<br>_33_1143 | US        | swine  | feces | 2018 | Salmonella enterica                                           | IS30                  |               |  |
| LM996894               | Norway    | human  | feces | 2010 | Escherichia coli                                              | IS3                   |               |  |
| SRR1999104             | US        | human  |       |      | Escherichia coli STEC                                         |                       |               |  |
| SRR1999965             |           |        |       |      |                                                               |                       |               |  |
| SRR3033416<br>_repA_   | US        | human  | feces | 2015 | Escherichia coli<br>O121:HNT                                  |                       |               |  |
| SRR3371767<br>_reve    | US        | human  | feces | 2009 | Escherichia coli<br>O121:H19                                  |                       |               |  |
| SRR3394634<br>_repA_   | US        | human  | feces | 2016 | Escherichia coli O157:H7                                      |                       |               |  |
| SRR6325208<br>_23_1143 | US        |        |       |      | Salmonella enterica                                           |                       |               |  |
| CP016388               | US        | human  | blood | 2013 | Salmonella enterica<br>subsp. enterica serovar<br>Typhimurium |                       |               |  |
| SRR3180482<br>_reve    | US        | human  | feces |      | Escherichia coli O157:H7                                      |                       |               |  |

|                        |          |        |          |      |                                                                      |                       |               |  |
|------------------------|----------|--------|----------|------|----------------------------------------------------------------------|-----------------------|---------------|--|
| CP019199               | US       | dairy  | feces    | 2001 | Salmonella enterica<br>subsp. enterica serovar<br>Muenster str. 0315 |                       |               |  |
| SRR6038699<br>_14_1143 | US       |        |          |      | Salmonella enterica                                                  |                       |               |  |
| LM995586               | Norway   | human  | feces    | 2006 | Escherichia coli                                                     | IS200/IS60<br>5       |               |  |
| KU922754               | China    | sewage |          | 2016 | Kluyvera ascorbata                                                   |                       | mcr-<br>1.1_1 |  |
| KY075654               | China    | human  |          |      | Escherichia coli                                                     | IS4                   | mcr-<br>1.1_1 |  |
| SRR6726287<br>_25_1143 | US       | human  | feces    | 2018 | Salmonella enterica                                                  | IS200/IS60<br>5       |               |  |
| CP006264               | Belgium  | human  |          | 2007 | Escherichia coli                                                     | IS200/IS60<br>5       |               |  |
| CP007134               | Belgium  | human  |          | 2007 | Escherichia coli                                                     | IS200/IS60<br>5       |               |  |
| SRR5598941<br>_19_1143 | Mongolia |        |          |      | Salmonella enterica<br>subsp. enterica serovar<br>Typhimurium        | IS200/IS60<br>5       |               |  |
| CP018106               | Germany  | human  | clinical | 2016 | Escherichia coli                                                     | IS200/IS60<br>5, IS30 | mcr-<br>1.1_1 |  |
| CP018112               | USA      | human  | clinical | 2016 | Escherichia coli                                                     | IS200/IS60<br>5, IS30 | mcr-<br>1.1_1 |  |
| CP018118               | USA      | human  | clinical | 2016 | Escherichia coli                                                     | IS200/IS60<br>5, IS30 | mcr-<br>1.1_1 |  |

|                        |        |         |          |      |                                                               |                       |               |  |
|------------------------|--------|---------|----------|------|---------------------------------------------------------------|-----------------------|---------------|--|
| CP018124               | USA    | human   | clinical | 2016 | Escherichia coli                                              | IS200/IS60<br>5, IS30 | mcr-<br>1.1_1 |  |
| KY471307               | Canada | human   |          |      | Escherichia coli                                              | IS200/IS60<br>5       | mcr-<br>1.1_1 |  |
| FR851304               | US     | turkey  |          | 1979 | Escherichia species                                           | IS200/IS60<br>5       |               |  |
| SRR1645577<br>_28_1143 | UK     | food    |          | 2012 | Salmonella enterica<br>subsp. enterica serovar<br>Typhimurium |                       |               |  |
| KX505142               | China  | chicken | feces    | 2015 | Cronobacter sakazakii                                         | IS200/IS60<br>5, IS30 | mcr-<br>1.1_1 |  |
| MG725031               |        | chicken | chicken  |      | Escherichia coli                                              | IS200/IS60<br>5       | mcr-<br>1.1_1 |  |
| MG210938               | China  | human   | urine    | 2015 | Escherichia coli                                              | IS200/IS60<br>5, IS30 | mcr-<br>1.1_1 |  |
| AP018355               |        | poultry |          |      | Escherichia coli                                              | IS200/IS60<br>5, IS30 | mcr-<br>1.1_1 |  |
| SRR5605966<br>_28_1143 | US     |         |          |      | Salmonella enterica                                           | IS200/IS60<br>5, IS30 | mcr-<br>1.1_1 |  |
| CP025679               | China  | chicken |          | 2014 | Escherichia albertii                                          | IS30                  | mcr-<br>1.1_1 |  |
| SRR3146366             | US     | human   | feces    |      | Escherichia coli<br>O118:H16                                  |                       |               |  |
| SRR2415816             | US     | human   | feces    | 2015 | Escherichia coli O71:H11                                      |                       |               |  |
| SRR2415818             | US     | human   | feces    | 2015 | Escherichia coli O71:H11                                      |                       |               |  |
| SRR2914294             | US     | human   | feces    | 2015 | Escherichia coli O71:H11                                      |                       |               |  |

|                        |         |       |             |      |                                                               |                       |               |  |
|------------------------|---------|-------|-------------|------|---------------------------------------------------------------|-----------------------|---------------|--|
| SRR3040516<br>_reve    | US      | human | feces       | 2015 | Escherichia coli O71:H11                                      |                       |               |  |
| SRR3371798<br>_repA_   | US      | human |             |      | Escherichia coli O157:H7                                      |                       |               |  |
| SRR6025892<br>_28_1143 | US      |       |             |      | Salmonella enterica                                           |                       |               |  |
| LT795506               |         | swine | feces       |      | Escherichia coli                                              |                       |               |  |
| SRR5486416<br>_13_1143 | US      |       |             |      | Salmonella enterica                                           |                       |               |  |
| SRR3295948<br>_21_1143 | US      | dairy |             | 2014 | Salmonella enterica<br>subsp. enterica serovar<br>Typhimurium |                       |               |  |
| SRR3360176             | US      | human |             |      | Escherichia coli STEC                                         |                       |               |  |
| SRR5875228<br>_18_1143 | US      |       | raw almonds | 2017 | Salmonella enterica                                           |                       |               |  |
| KY624633               | Bolivia |       | food        | 2013 | Citrobacter braakii                                           | IS91                  | mcr-<br>1.1_1 |  |
| KU761326               | China   | human |             | 2015 | Escherichia coli                                              | IS200/IS60<br>5       | mcr-<br>1.1_1 |  |
| MG946761               |         |       |             |      | Escherichia coli                                              | IS200/IS60<br>5       | mcr-<br>1.1_1 |  |
| CP016405               | US      | swine | cecum       | 2016 | Escherichia coli                                              | IS200/IS60<br>5       | mcr-<br>1.1_1 |  |
| MK542639               | Russia  | bird  | Black kite  |      | Escherichia coli                                              |                       | mcr-<br>1.1_1 |  |
| CP024135               | China   | human | clinical    | 2014 | Escherichia coli                                              | IS200/IS60<br>5, IS30 | mcr-<br>1.1_1 |  |

|          |       |       |       |      |                  |                      |               |  |
|----------|-------|-------|-------|------|------------------|----------------------|---------------|--|
| KY075651 | China | swine |       |      | Escherichia coli | IS200/IS60<br>5, IS3 | mcr-<br>1.1_1 |  |
| KY075662 | China | swine |       |      | Escherichia coli | IS200/IS60<br>5      | mcr-<br>1.1_1 |  |
| MF774183 | China | swine | feces |      | Escherichia coli | IS30, IS5            | mcr-<br>1.1_1 |  |
| KY792081 |       |       |       |      | Escherichia coli |                      | mcr-<br>1.8_1 |  |
| MG299127 | China | human |       | 2016 | Shigella sonnei  | IS1,<br>IS200/IS60   | mcr-<br>1.1_1 |  |
| MG299129 | China | human |       | 2016 | Shigella sonnei  | IS1,<br>IS200/IS60   | mcr-<br>1.1_1 |  |
| MG299132 | China | human |       | 2016 | Shigella sonnei  | IS1,<br>IS200/IS60   | mcr-<br>1.1_1 |  |
| MG299134 | China | human |       | 2016 | Shigella sonnei  | IS1,<br>IS200/IS60   | mcr-<br>1.1_1 |  |
| MG299136 | China | human |       | 2016 | Shigella sonnei  | IS1,<br>IS200/IS60   | mcr-<br>1.1_1 |  |
| MG299138 | China | human |       | 2016 | Shigella sonnei  | IS1,<br>IS200/IS60   | mcr-<br>1.1_1 |  |
| MG299140 | China | human |       | 2016 | Shigella sonnei  | IS1,<br>IS200/IS60   | mcr-<br>1.1_1 |  |
| MG299142 | China | human |       | 2016 | Shigella sonnei  | IS1,<br>IS200/IS60   | mcr-<br>1.1_1 |  |
| MG299144 | China | human |       | 2016 | Shigella sonnei  | IS1,<br>IS200/IS60   | mcr-<br>1.1_1 |  |

|                        |              |         |         |      |                                                               |                    |               |            |
|------------------------|--------------|---------|---------|------|---------------------------------------------------------------|--------------------|---------------|------------|
| MG299146               | China        | human   |         | 2016 | Shigella sonnei                                               | IS1,<br>IS200/IS60 | mcr-<br>1.1_1 |            |
| MG299148               | China        | human   |         | 2016 | Shigella sonnei                                               | IS1,<br>IS200/IS60 | mcr-<br>1.1_1 |            |
| MG299150               | China        | human   |         | 2016 | Shigella sonnei                                               | IS1,<br>IS200/IS60 | mcr-<br>1.1_1 |            |
| MG299152               | China        | human   |         | 2016 | Shigella sonnei                                               | IS1,<br>IS200/IS60 | mcr-<br>1.1_1 |            |
| KY471314               | Argentina    | human   |         |      | Escherichia coli                                              | IS200/IS60<br>5    | mcr-<br>1.1_1 |            |
| MF693349               | Argentina    | human   | feces   | 2016 | Escherichia coli                                              | IS200/IS60<br>5    | mcr-<br>1.1_1 |            |
| KU870627               | South Africa | chicken |         | 2015 | Escherichia coli                                              | IS30               | mcr-<br>1.1_1 |            |
| SRR4044568<br>_18_1143 | US           |         |         |      | Salmonella enterica                                           |                    |               |            |
| SRR4429355<br>_18_1143 | US           |         |         |      | Salmonella enterica                                           |                    |               |            |
| CP043220               | Canada       | chicken | chicken | 2016 | Escherichia coli O80:H26                                      | IS1380             |               | blaCMY-2_1 |
| JN983044               | US           | swine   |         | 2002 | Salmonella enterica<br>subsp enterica serovar<br>Heidelberg   | IS1380             |               | blaCMY-2_1 |
| SRR3048532<br>_28_1143 | UK           | human   |         |      | Salmonella enterica<br>subsp. enterica serovar<br>Typhimurium | IS200/IS60<br>5    |               |            |
| SRR4123917<br>_14_1143 | Tanzania     | bovine  |         | 2013 | Salmonella enterica<br>subsp. enterica                        | IS200/IS60<br>5    |               |            |

|                        |           |              |            |      |                                                      |                 |               |                   |
|------------------------|-----------|--------------|------------|------|------------------------------------------------------|-----------------|---------------|-------------------|
| KY012274               | China     | human        | blood      | 2014 | Escherichia coli                                     |                 | mcr-<br>1.1_1 |                   |
| CP016185               | Malaysia  | chicken      | liver      | 2013 | Escherichia coli                                     | IS1             | mcr-<br>1.1_1 |                   |
| CP016186               | Malaysia  | pond water   |            | 2013 | Escherichia coli                                     |                 | mcr-<br>1.1_1 |                   |
| CP016187               | Malaysia  | chicken feed |            | 2013 | Escherichia coli                                     |                 | mcr-<br>1.1_1 |                   |
| CP021176               | Taiwan    | human        | urine      | 2016 | Escherichia coli                                     |                 | mcr-<br>1.1_1 |                   |
| KU934209               | China     | chicken      | intestines |      | Salmonella enterica                                  | IS1380,<br>IS30 | mcr-<br>1.1_1 | blaCTX-M-<br>55_1 |
| KX013539               | Bahrain   | human        | urine      | 2015 | Escherichia coli                                     | IS91            | mcr-<br>1.1_1 |                   |
| KY120365               | Taiwan    | swine        |            | 2012 | Salmonella enterica<br>subsp. enterica               |                 | mcr-<br>1.1_1 |                   |
| KY795978               | Australia | human        | urine      | 2011 | Escherichia coli                                     |                 | mcr-<br>1.1_1 |                   |
| SRR7439317<br>_24_1143 | UK        | human        |            | 2017 | Salmonella enterica<br>subsp. Enterica<br>monophasic |                 |               |                   |
| KY693674               | Oman      | human        | blood      | 2016 | Escherichia coli                                     | IS3             | mcr-<br>1.1_1 |                   |
| KY829117               | China     |              |            |      | Escherichia coli                                     | IS30            | mcr-<br>1.7_1 |                   |
| KX013540               | Bahrain   | human        | bed sore   | 2015 | Escherichia coli                                     | IS1380          | mcr-<br>1.1_1 | blaCTX-M-<br>64_1 |

|                        |           |        |          |      |                                                                  |                       |               |  |
|------------------------|-----------|--------|----------|------|------------------------------------------------------------------|-----------------------|---------------|--|
| SRR5361111<br>_28_1143 | US        |        |          |      | Salmonella enterica                                              | IS200/IS60<br>5       |               |  |
| KY471315               | Argentina | human  |          |      | Escherichia coli                                                 |                       | mcr-<br>1.1_1 |  |
| MG598814               | Argentina |        | urine    |      | Escherichia coli                                                 | IS30                  | mcr-<br>1.5_1 |  |
| SRR5921392<br>_12_1143 | US        | human  | feces    | 2017 | Salmonella enterica<br>subsp. enterica serovar<br>Enteritidis    | IS200/IS60<br>5       |               |  |
| SRR2082855<br>_16_1143 | US        | turkey | retail   | 2006 | Salmonella enterica<br>subsp. enterica serovar<br>Schwarzengrund |                       |               |  |
| SRR7170539<br>_29_1143 | US        |        |          |      | Salmonella enterica                                              |                       |               |  |
| KY075661               | China     | swine  |          |      | Escherichia coli                                                 | IS200/IS60<br>5       | mcr-<br>1.1_1 |  |
| CP024139               | China     | human  | clinical | 2014 | Escherichia coli                                                 | IS200/IS60<br>5, IS30 | mcr-<br>1.1_1 |  |
| KX084393               | China     |        |          | 2016 | Escherichia coli                                                 | IS200/IS60<br>5       | mcr-<br>1.1_1 |  |
| KX254342               | China     |        |          |      | Escherichia coli                                                 | IS200/IS60<br>5       | mcr-<br>1.1_1 |  |
| AP018806               | Japan     | bovine | feces    | 2013 | Escherichia coli                                                 |                       | mcr-<br>1.1_1 |  |
| KY075657               | China     | swine  |          |      | Escherichia coli                                                 | IS4                   | mcr-<br>1.1_1 |  |



|          |       |        |       |      |                                                               |                     |               |                   |
|----------|-------|--------|-------|------|---------------------------------------------------------------|---------------------|---------------|-------------------|
| KY075658 | China | swine  |       |      | Escherichia coli                                              | IS4                 | mcr-<br>1.1_1 |                   |
| CP021205 | China | human  | blood | 2014 | Escherichia coli                                              | IS3, IS91           | mcr-<br>1.1_1 |                   |
| KX592672 | China | human  | blood | 2014 | Escherichia coli                                              | IS1                 | mcr-<br>1.1_1 |                   |
| KX772778 | China | human  |       | 2016 | Escherichia coli                                              | IS1380              | mcr-<br>1.1_1 | blaCTX-M-<br>55_1 |
| KX856067 | China | human  | feces | 2013 | Salmonella enterica<br>subsp. enterica serovar<br>Typhimurium |                     | mcr-<br>1.1_1 |                   |
| KY363998 | China | human  |       | 2011 | Shigella sonnei                                               |                     | mcr-<br>1.1_1 |                   |
| MF774181 | China | swine  | feces |      | Escherichia coli                                              | IS30, IS66          | mcr-<br>1.1_1 |                   |
| KY784668 | China | swine  | feces |      | Shigella flexneri Y                                           | IS110, IS3,<br>IS30 | mcr-<br>1.1_1 |                   |
| AP017614 | Japan | swine  |       | 2008 | Escherichia coli                                              | IS30                | mcr-<br>1.1_1 |                   |
| AP017619 | Japan | bovine |       | 2012 | Escherichia coli                                              | IS30                | mcr-<br>1.1_1 |                   |
| AP017622 | Japan | bovine |       | 2013 | Escherichia coli                                              | IS30                | mcr-<br>1.1_1 |                   |
| AP018110 | Japan | human  | urine | 2016 | Escherichia coli                                              | IS30                | mcr-<br>1.5_1 |                   |
| AP018412 |       |        |       |      | Escherichia coli                                              |                     | mcr-<br>1.1_1 |                   |

|          |                    |         |          |      |                                                               |             |               |  |
|----------|--------------------|---------|----------|------|---------------------------------------------------------------|-------------|---------------|--|
| AP018812 | Japan              | bovine  | feces    | 2014 | Escherichia coli                                              | IS91        | mcr-<br>1.1_1 |  |
| AP019686 | Japan              |         |          | 2017 | Escherichia coli                                              |             | mcr-<br>1.1_1 |  |
| CP021194 | China              | human   | clinical | 2012 | Escherichia coli                                              |             | mcr-<br>1.1_1 |  |
| CP041113 | Thailand           | swine   | feces    | 2016 | Escherichia coli                                              | IS30, IS630 | mcr-<br>1.1_1 |  |
| KP347127 | China              | swine   |          | 2015 | Escherichia coli                                              | IS30, IS66  | mcr-<br>1.1_1 |  |
| KU934208 | China              | chicken |          | 2013 | Escherichia coli                                              |             | mcr-<br>1.3_1 |  |
| KX013538 | United Arab<br>Rep | human   | blood    | 2013 | Escherichia coli                                              | IS30        | mcr-<br>1.1_1 |  |
| KX580716 |                    |         |          |      | Escherichia coli                                              | IS91        | mcr-<br>1.1_1 |  |
| KX856068 | China              | human   | feces    | 2012 | Salmonella enterica<br>subsp. enterica serovar<br>Enteritidis | IS30        | mcr-<br>1.1_1 |  |
| KY120366 | Taiwan             | human   |          |      | Salmonella enterica<br>subsp. enterica                        |             | mcr-<br>1.1_1 |  |
| KY363994 | China              | human   | feces    | 2012 | Shigella sonnei                                               |             | mcr-<br>1.1_1 |  |
| KY363995 | China              | human   | feces    | 2013 | Shigella sonnei                                               |             | mcr-<br>1.1_1 |  |
| KY363996 | China              | human   |          | 2011 | Shigella sonnei                                               | IS30, IS91  | mcr-<br>1.1_1 |  |

|          |             |       |                                     |      |                  |                 |           |  |
|----------|-------------|-------|-------------------------------------|------|------------------|-----------------|-----------|--|
| KY363997 | China       | human |                                     | 2011 | Shigella sonnei  | IS1, IS30, IS91 | mcr-1.1_1 |  |
| KY363999 | China       | human | feces                               | 2010 | Shigella sonnei  | IS1, IS30, IS91 | mcr-1.1_1 |  |
| KY405001 | South Korea |       | blood                               |      | Escherichia coli | IS66            | mcr-1.1_1 |  |
| KY471144 |             |       |                                     |      | Escherichia coli | IS3             | mcr-1.1_1 |  |
| KY471308 | Argentina   | human |                                     |      | Escherichia coli | IS30            | mcr-1.5_1 |  |
| KY471309 | Argentina   | human |                                     |      | Escherichia coli |                 | mcr-1.1_1 |  |
| KY471310 | Argentina   | human |                                     |      | Escherichia coli | IS30            | mcr-1.5_1 |  |
| KY471311 | Argentina   | human |                                     |      | Escherichia coli | IS30            | mcr-1.5_1 |  |
| KY471312 | Argentina   | human |                                     |      | Escherichia coli | IS91            | mcr-1.1_1 |  |
| KY471313 | Argentina   | human |                                     |      | Escherichia coli | IS91            | mcr-1.1_1 |  |
| KY795977 | Australia   | human | urine                               | 2011 | Escherichia coli |                 | mcr-1.1_1 |  |
| LC469775 | Japan       |       | wastewater                          | 2018 | Escherichia coli |                 | mcr-1.1_1 |  |
| LC473131 | Japan       |       | influent<br>municipal<br>wastewater |      | Escherichia coli |                 | mcr-1.1_1 |  |

|          |           |         |                 |      |                                                               |          |               |  |
|----------|-----------|---------|-----------------|------|---------------------------------------------------------------|----------|---------------|--|
| LT174530 | Vietnam   | human   | feces           | 2008 | Shigella sonnei                                               | IS30     | mcr-<br>1.1_1 |  |
| MF069152 | China     | chicken | small intestine | 2012 | Escherichia coli                                              | IS30     | mcr-<br>1.1_1 |  |
| MG210940 | China     | human   | ascites         | 2015 | Escherichia coli                                              | IS1, IS5 | mcr-<br>1.1_1 |  |
| MG489944 | Thailand  | chicken | retail          |      | Escherichia coli                                              | IS30     | mcr-<br>1.1_1 |  |
| MG557851 | Thailand  | chicken | feces           |      | Escherichia coli                                              | IS30     | mcr-<br>1.1_1 |  |
| MG594798 | Argentina |         | urine           |      | Escherichia coli                                              | IS30     | mcr-<br>1.5_1 |  |
| MG594799 | Argentina |         | urine           |      | Escherichia coli                                              |          | mcr-<br>1.1_1 |  |
| MG598815 | Argentina |         | urine           |      | Escherichia coli                                              |          | mcr-<br>1.1_1 |  |
| MG825369 |           | swine   | retail          |      | Escherichia coli                                              | IS4      | mcr-<br>1.1_1 |  |
| MH271383 | Argentina | dog     | urine           |      | Escherichia coli                                              |          | mcr-<br>1.1_1 |  |
| MH522410 |           |         |                 |      | Salmonella enterica<br>subsp. enterica serovar<br>Typhimurium | IS30     | mcr-<br>1.1_1 |  |
| MH522414 |           | human   |                 |      | Salmonella enterica<br>subsp. enterica serovar<br>Typhimurium |          | mcr-<br>1.1_1 |  |

|                        |              |         |       |      |                                                               |           |               |                    |
|------------------------|--------------|---------|-------|------|---------------------------------------------------------------|-----------|---------------|--------------------|
| MH522416               |              | human   |       |      | Salmonella enterica<br>subsp. enterica serovar<br>Typhimurium |           | mcr-<br>1.1_1 |                    |
| MK041211               | Argentina    |         | feces |      | Citrobacter<br>amalonaticus                                   | IS30      | mcr-<br>1.5_1 |                    |
| KX032519               | South Africa | human   | blood | 2014 | Escherichia coli                                              | IS3, IS30 | mcr-<br>1.1_1 |                    |
| KY075656               | China        | swine   |       |      | Escherichia coli                                              |           | mcr-<br>1.1_1 |                    |
| KY471145               |              |         |       |      | Escherichia coli                                              | IS3       | mcr-<br>1.1_1 |                    |
| KY802014               | China        | human   | feces | 2015 | Escherichia coli                                              | IS1380    | mcr-<br>1.1_1 | blaCTX-M-<br>199_1 |
| MG267386               | China        | chicken |       |      | Klebsiella pneumoniae                                         | IS1380    | mcr-<br>7.1_1 | blaCTX-M-<br>55_1  |
| KU932023               | Finland      | human   |       |      | Escherichia coli                                              |           |               |                    |
| KU932022               | Finland      | Human   |       |      | Escherichia coli                                              |           |               |                    |
| SRR3392791<br>_18_1143 | US           |         |       |      | Salmonella enterica                                           |           |               |                    |

### Supplemental Table S2 – MOB-suite analysis results

A - Full dataset:

| MOB node | # per MOB | # with IS | % with IS | # with mcr | % with mcr |
|----------|-----------|-----------|-----------|------------|------------|
| AI345    | 16        | 0         | 0.00      | 0          | 0          |
| AI346    | 38        | 3         | 7.89      | 0          | 0          |
| AI347    | 49        | 17        | 34.69     | 5          | 10.20      |
| AI348    | 26        | 17        | 65.38     | 17         | 65.38      |

|       |     |    |       |     |       |
|-------|-----|----|-------|-----|-------|
| AI349 | 19  | 17 | 89.47 | 1   | 5.26  |
| AI350 | 123 | 86 | 69.92 | 113 | 91.87 |

## B – USA dataset

|       | Number | # with IS | % with IS | with mcr | Internal cluster percent |
|-------|--------|-----------|-----------|----------|--------------------------|
| AI345 | 15     | 0         | 0         | 0        | 27                       |
| AI346 | 33     | 0         | 0         | 0        | 6                        |
| AI347 | 35     | 8         | 22.86     | 4        | 46                       |
| AI348 | 9      | 1         | 11.11     | 0        | 67                       |
| AI349 | 4      | 2         | 50        | 0        | 100                      |
| AI350 | 10     | 7         | 70        | 3        | 100                      |

Supplemental Table S3: Core genes identified in USA collection

| Gene  | Annotation                                          | No. isolates |
|-------|-----------------------------------------------------|--------------|
| virB1 | TraB                                                | 271          |
| pilM  | conjugative transfer protein PilM                   | 271          |
| yheC  | CaiF/GrlA family transcriptional regulator          | 271          |
| yaeC  | YaeC protein                                        | 271          |
| yafA  | YafA protein                                        | 271          |
| traH  | TraH                                                | 271          |
| ygeA  | YgeA                                                | 271          |
| parA  | plasmid partitioning protein ParA                   | 271          |
| nfeD  | putative nodulation efficiency family protein       | 271          |
| pilU  | prepilin peptidase PilU                             | 270          |
| pilT  | conjugative transfer putative membrane protein PilT | 270          |
| pilP  | type IV pilus biogenesis protein PilP               | 270          |

|           |                                               |     |
|-----------|-----------------------------------------------|-----|
| yhaA      | YhaA protein                                  | 270 |
| pilO      | Incl1 plasmid pilus assembly protein PilO     | 269 |
| tral      | Tral                                          | 268 |
| traC      | TraC                                          | 267 |
| yddA      | YddA protein                                  | 267 |
| rcbA      | Double-strand break reduction protein         | 267 |
| pilL      | conjugative transfer protein PilL             | 267 |
| traK      | TraK                                          | 267 |
| traJ      | TraJ                                          | 265 |
| virB4     | ATPase VirB4                                  | 264 |
| pilN      | conjugative transfer lipoprotein PilN         | 263 |
| repA      | replication initiation protein                | 262 |
| ydfA      | transcriptional regulator                     | 261 |
| group_225 | homocysteine methyltransferase domain protein | 261 |
| yebA      | YebA protein                                  | 260 |
| traD      | TraD                                          | 257 |
| group_193 | putative membrane protein                     | 254 |

Supplemental Table S4: Metadata file - Linkage analysis AMOVA results. Populations compared are Group 1 and Group 2 from Figure 3.

|                 | Among<br>population: |         |      |         |             | Within<br>populations: |      |         |             | Fixation<br>indices: |         |
|-----------------|----------------------|---------|------|---------|-------------|------------------------|------|---------|-------------|----------------------|---------|
|                 | Locus                | SSD     | d.f. | Va      | % variation | SSD                    | d.f. | Vb      | % variation | FST                  | P-value |
| DNA replication | 1                    | 2.41487 | 1    | 0.03922 | 8.43584     | 44.27381               | 104  | 0.42571 | 91.56416    | 0.08436              | 0       |
| hypothetical    | 2                    | 2.00171 | 1    | 0.03042 | 6.21694     | 47.7247                | 104  | 0.45889 | 93.78306    | 0.06217              | 0       |
| hypothetical    | 3                    | 2.22525 | 1    | 0.03533 | 7.53688     | 45.07664               | 104  | 0.43343 | 92.46312    | 0.07537              | 0       |

|                                                                    |    |         |   |         |          |          |     |         |          |         |   |
|--------------------------------------------------------------------|----|---------|---|---------|----------|----------|-----|---------|----------|---------|---|
| toxin-antitoxin<br>system                                          | 7  | 2.75533 | 1 | 0.04672 | 10.80229 | 40.12202 | 104 | 0.38579 | 89.19771 | 0.10802 | 0 |
| DNA -binding<br>transcriptional<br>regulator<br>(prophage)         | 11 | 3.77111 | 1 | 0.08297 | 17.59672 | 31.46986 | 81  | 0.38852 | 82.40328 | 0.17597 | 0 |
| rpoS stabilizer<br>(hypothetical)                                  | 15 | 2.03647 | 1 | 0.04578 | 10.43655 | 32.21353 | 82  | 0.39285 | 89.56345 | 0.10437 | 0 |
| lipoprotein<br>(hypothetical)                                      | 20 | 3.31508 | 1 | 0.05829 | 13.98494 | 37.28869 | 104 | 0.35855 | 86.01506 | 0.13985 | 0 |
| oxidoreductase,<br>disulfide bond<br>formation, phoP<br>regulation | 23 | 2.39167 | 1 | 0.04547 | 11.62779 | 32.48333 | 94  | 0.34557 | 88.37221 | 0.11628 | 0 |
| spoVR family<br>protein -<br>sporulation                           | 24 | 2.12314 | 1 | 0.0364  | 7.67999  | 41.12686 | 94  | 0.43752 | 92.32001 | 0.0768  | 0 |
| conjugative<br>transfer protein                                    | 26 | 2.37    | 1 | 0.07829 | 18.82372 | 16.88    | 50  | 0.3376  | 81.17628 | 0.18824 | 0 |
| zinc transporter                                                   | 27 | 3.25308 | 1 | 0.11304 | 26.20053 | 15.92    | 50  | 0.3184  | 73.79947 | 0.26201 | 0 |
| nickase regulator                                                  | 28 | 2.16608 | 1 | 0.03527 | 8.54871  | 39.23958 | 104 | 0.3773  | 91.45129 | 0.08549 | 0 |
| nickase                                                            | 29 | 1.36356 | 1 | 0.01743 | 3.5093   | 49.85342 | 104 | 0.47936 | 96.4907  | 0.03509 | 0 |
| nickase                                                            | 30 | 1.41323 | 1 | 0.02538 | 5.29747  | 39.93122 | 88  | 0.45376 | 94.70253 | 0.05297 | 0 |
| nickase                                                            | 31 | 2.81361 | 1 | 0.04902 | 13.0212  | 34.05432 | 104 | 0.32745 | 86.9788  | 0.13021 | 0 |
| membrane<br>transporter                                            | 35 | 2.49165 | 1 | 0.04044 | 8.40369  | 45.83854 | 104 | 0.44076 | 91.59631 | 0.08404 | 0 |



|                                                                      |    |         |   |         |          |          |     |         |          |         |   |
|----------------------------------------------------------------------|----|---------|---|---------|----------|----------|-----|---------|----------|---------|---|
| DNA                                                                  |    |         |   |         |          |          |     |         |          |         |   |
| topoisomerase                                                        | 37 | 1.87302 | 1 | 0.02804 | 5.74692  | 47.36508 | 103 | 0.45986 | 94.25308 | 0.05747 | 0 |
| hypothetical                                                         | 38 | 2.79214 | 1 | 0.06831 | 16.13013 | 25.57273 | 72  | 0.35518 | 83.86987 | 0.1613  | 0 |
| hypothetical                                                         | 39 | 5.57097 | 1 | 0.13855 | 28.26602 | 27.0746  | 77  | 0.35162 | 71.73398 | 0.28266 | 0 |
| hypothetical                                                         | 40 | 2.45635 | 1 | 0.07993 | 18.29684 | 18.20402 | 51  | 0.35694 | 81.70316 | 0.18297 | 0 |
| methionine<br>sulfoxide<br>reductase<br>(membrane<br>protein repair) | 41 | 3.51216 | 1 | 0.06834 | 14.60895 | 38.34498 | 96  | 0.39943 | 85.39105 | 0.14609 | 0 |
| murein DD-<br>endopeptidase<br>(cell wall<br>expansion)              | 42 | 3.43082 | 1 | 0.06619 | 13.73632 | 39.90591 | 96  | 0.41569 | 86.26368 | 0.13736 | 0 |
| shufflon-specific<br>recombinase                                     | 43 | 3.67195 | 1 | 0.06702 | 14.57596 | 39.66786 | 101 | 0.39275 | 85.42404 | 0.14576 | 0 |
| pilin - surface<br>protein                                           | 44 | 3.68086 | 1 | 0.07921 | 21.77461 | 24.75734 | 87  | 0.28457 | 78.22539 | 0.21775 | 0 |
| pilus<br>modification                                                | 47 | 1.13968 | 1 | 0.01316 | 2.68727  | 49.07937 | 103 | 0.4765  | 97.31273 | 0.02687 | 0 |
| pilus motility<br>protein                                            | 48 | 1.85079 | 1 | 0.02768 | 5.72894  | 46.92063 | 103 | 0.45554 | 94.27106 | 0.05729 | 0 |
| pilus motility<br>protein                                            | 49 | 3.19683 | 1 | 0.05531 | 11.91306 | 42.12698 | 103 | 0.409   | 88.08694 | 0.11913 | 0 |
| fimbriae<br>regulatory<br>protein                                    | 51 | 2.76825 | 1 | 0.0462  | 9.502    | 45.31746 | 103 | 0.43998 | 90.498   | 0.09502 | 0 |

|                                                |    |         |   |         |          |          |     |         |          |         |   |
|------------------------------------------------|----|---------|---|---------|----------|----------|-----|---------|----------|---------|---|
| pilus secretion                                | 52 | 2.49048 | 1 | 0.04046 | 8.22437  | 46.5     | 103 | 0.45146 | 91.77563 | 0.08224 | 0 |
| pilus assembly                                 | 53 | 2.15079 | 1 | 0.03386 | 7.08274  | 45.75397 | 103 | 0.44421 | 92.91726 | 0.07083 | 0 |
| pilus assembly                                 | 54 | 2.6     | 1 | 0.04379 | 10.02608 | 40.47619 | 103 | 0.39297 | 89.97392 | 0.10026 | 0 |
| pilus assembly                                 | 55 | 2.58413 | 1 | 0.04234 | 8.60061  | 46.34921 | 103 | 0.44999 | 91.39939 | 0.08601 | 0 |
| D-serine<br>permease<br>(transporter)          | 56 | 2.26738 | 1 | 0.08608 | 17.73603 | 17.96667 | 45  | 0.39926 | 82.26397 | 0.17736 | 0 |
| pilus assembly                                 | 57 | 2.44603 | 1 | 0.03949 | 7.97344  | 46.94444 | 103 | 0.45577 | 92.02656 | 0.07973 | 0 |
| plasmid transfer<br>regulator<br>(conjugation) | 58 | 3.17619 | 1 | 0.05431 | 11.00987 | 45.21429 | 103 | 0.43897 | 88.99013 | 0.1101  | 0 |
| conjugative<br>transfer relaxase               | 59 | 3.27349 | 1 | 0.05598 | 11.42232 | 45.15104 | 104 | 0.43414 | 88.57768 | 0.11422 | 0 |
| conjugative<br>transfer system<br>protein      | 60 | 6.71629 | 1 | 0.12578 | 27.17404 | 35.05729 | 104 | 0.33709 | 72.82596 | 0.27174 | 0 |
| conjugative<br>transfer system<br>protein      | 61 | 2.63931 | 1 | 0.04398 | 9.70948  | 42.53051 | 104 | 0.40895 | 90.29052 | 0.09709 | 0 |
| conjugative<br>transfer system<br>protein      | 63 | 2.86603 | 1 | 0.04763 | 9.56363  | 46.84152 | 104 | 0.4504  | 90.43637 | 0.09564 | 0 |
| conjugative<br>transfer system<br>protein      | 64 | 5.01485 | 1 | 0.09168 | 20.07718 | 37.95685 | 104 | 0.36497 | 79.92282 | 0.20077 | 0 |

|                                           |    |         |   |         |          |          |     |         |          |         |   |
|-------------------------------------------|----|---------|---|---------|----------|----------|-----|---------|----------|---------|---|
| conjugative<br>transfer system<br>protein | 65 | 7.17081 | 1 | 0.13556 | 31.43253 | 30.75372 | 104 | 0.29571 | 68.56747 | 0.31433 | 0 |
| pilus assembly                            | 66 | 2.19786 | 1 | 0.03523 | 7.89512  | 42.74554 | 104 | 0.41101 | 92.10488 | 0.07895 | 0 |
| racemase                                  | 67 | 3.71493 | 1 | 0.06501 | 13.46959 | 43.43601 | 104 | 0.41765 | 86.53041 | 0.1347  | 0 |
| conjugative<br>transfer system<br>protein | 69 | 2.83492 | 1 | 0.04745 | 9.66066  | 45.69841 | 103 | 0.44367 | 90.33934 | 0.09661 | 0 |
| arginine<br>transport                     | 70 | 5.27597 | 1 | 0.09656 | 20.30925 | 39.40327 | 104 | 0.37888 | 79.69075 | 0.20309 | 0 |
| ion channel                               | 73 | 3.22347 | 1 | 0.05962 | 12.33597 | 40.67449 | 96  | 0.42369 | 87.66403 | 0.12336 | 0 |
| ATPase                                    | 75 | 1.80944 | 1 | 0.02694 | 5.72791  | 46.10565 | 104 | 0.44332 | 94.27209 | 0.05728 | 0 |
| conjugal transfer<br>protein              | 76 | 1.89259 | 1 | 0.03849 | 8.08253  | 38.51852 | 88  | 0.43771 | 91.91747 | 0.08083 | 0 |
| kinase                                    | 77 | 3.41936 | 1 | 0.06111 | 16.02709 | 33.29762 | 104 | 0.32017 | 83.97291 | 0.16027 | 0 |
| hypothetical                              | 78 | 2.82519 | 1 | 0.04822 | 11.27443 | 39.46726 | 104 | 0.37949 | 88.72557 | 0.11274 | 0 |
| hypothetical                              | 79 | 2.39844 | 1 | 0.06737 | 16.03914 | 24.33395 | 69  | 0.35267 | 83.96086 | 0.16039 | 0 |
| membrane<br>protein                       | 80 | 3.67272 | 1 | 0.06594 | 16.7116  | 34.17634 | 104 | 0.32862 | 83.2884  | 0.16712 | 0 |
| putative<br>chaperone<br>protein          | 81 | 2.58307 | 1 | 0.0427  | 9.28346  | 43.39807 | 104 | 0.41729 | 90.71654 | 0.09283 | 0 |
| Rnase targeting<br>protein                | 82 | 1.95888 | 1 | 0.02974 | 6.19441  | 46.84301 | 104 | 0.45041 | 93.80559 | 0.06194 | 0 |
| hypothetical                              | 87 | 3.02381 | 1 | 0.05246 | 12.13643 | 39.11905 | 103 | 0.3798  | 87.86357 | 0.12136 | 0 |
| hypothetical                              | 88 | 2.90092 | 1 | 0.06081 | 12.6244  | 33.67225 | 80  | 0.4209  | 87.3756  | 0.12624 | 0 |

|                                            |     |         |   |         |          |          |     |         |          |         |         |
|--------------------------------------------|-----|---------|---|---------|----------|----------|-----|---------|----------|---------|---------|
| putative<br>transporter                    | 89  | 1.94992 | 1 | 0.05954 | 15.03047 | 20.19524 | 60  | 0.33659 | 84.96953 | 0.1503  | 0       |
| exodeoxyribonuc<br>lease V                 | 101 | 1.77139 | 1 | 0.09042 | 19.47202 | 15.70588 | 42  | 0.37395 | 80.52798 | 0.19472 | 0       |
| putative<br>transcriptional<br>regulator   | 109 | 3.43947 | 1 | 0.13377 | 29.27972 | 16.80127 | 52  | 0.3231  | 70.72028 | 0.2928  | 0       |
| acyl-CoA<br>esterase                       | 110 | 3.45401 | 1 | 0.1348  | 30.0657  | 16.30525 | 52  | 0.31356 | 69.9343  | 0.30066 | 0       |
| dihydroxyaceton<br>e kinase subunit        | 112 | 3.41915 | 1 | 0.13307 | 29.4208  | 16.59936 | 52  | 0.31922 | 70.5792  | 0.29421 | 0       |
| hypothetical                               | 117 | 2.14722 | 1 | 0.21291 | 45.53277 | 4.075    | 16  | 0.25469 | 54.46723 | 0.45533 | 0       |
| conjugation<br>regulator                   | 8   | 2.56579 | 1 | 0.04372 | 11.14605 | 36.24554 | 104 | 0.34851 | 88.85395 | 0.11146 | 0.00098 |
| toxin-antitoxin<br>system                  | 22  | 1.88813 | 1 | 0.03105 | 9.01436  | 32.59301 | 104 | 0.31339 | 90.98564 | 0.09014 | 0.00098 |
| conjugative<br>transfer system<br>protein  | 62  | 0.81953 | 1 | 0.01341 | 8.76088  | 14.52009 | 104 | 0.13962 | 91.23912 | 0.08761 | 0.00098 |
| prepilin leader<br>peptidase/methy<br>lase | 85  | 1.58081 | 1 | 0.02276 | 5.06368  | 44.37202 | 104 | 0.42665 | 94.93632 | 0.05064 | 0.00098 |
| hypothetical                               | 91  | 3.10898 | 1 | 0.10975 | 32.05313 | 13.02895 | 56  | 0.23266 | 67.94687 | 0.32053 | 0.00098 |
| hypothetical                               | 108 | 1.89583 | 1 | 0.29315 | 68.16609 | 1.91667  | 14  | 0.1369  | 31.83391 | 0.68166 | 0.00098 |
| porin protein                              | 113 | 2.58293 | 1 | 0.1493  | 37.46924 | 8.9697   | 36  | 0.24916 | 62.53076 | 0.37469 | 0.00098 |

|                                               |     |         |   |         |          |          |     |         |          |         |         |
|-----------------------------------------------|-----|---------|---|---------|----------|----------|-----|---------|----------|---------|---------|
| diketo-D-<br>gluconate<br>reductase           | 10  | 1.82414 | 1 | 0.02826 | 6.74128  | 40.65699 | 104 | 0.39093 | 93.25872 | 0.06741 | 0.00196 |
| hypothetical                                  | 25  | 1.21    | 1 | 0.02963 | 6.29818  | 22.04    | 50  | 0.4408  | 93.70182 | 0.06298 | 0.00196 |
| pilin - surface<br>protein                    | 50  | 1.7     | 1 | 0.02591 | 6.16851  | 40.59524 | 103 | 0.39413 | 93.83149 | 0.06169 | 0.00196 |
| hypothetical                                  | 105 | 1.46349 | 1 | 0.06999 | 15.73735 | 16.11429 | 43  | 0.37475 | 84.26265 | 0.15737 | 0.00293 |
| site-specific<br>recombinase                  | 107 | 1.57192 | 1 | 0.07693 | 16.24709 | 13.48364 | 34  | 0.39658 | 83.75291 | 0.16247 | 0.00293 |
| periplasmic<br>endochitinase/ly<br>sozyme     | 84  | 1.55498 | 1 | 0.02291 | 5.51065  | 40.86012 | 104 | 0.39289 | 94.48935 | 0.05511 | 0.00391 |
| hypothetical                                  | 104 | 1.74248 | 1 | 0.12194 | 32.51989 | 6.57895  | 26  | 0.25304 | 67.48011 | 0.3252  | 0.00391 |
| exonuclease                                   | 16  | 1.57977 | 1 | 0.06484 | 16.98638 | 13.94196 | 44  | 0.31686 | 83.01362 | 0.16986 | 0.00489 |
| hypothetical                                  | 90  | 1.40629 | 1 | 0.03913 | 9.45048  | 22.49694 | 60  | 0.37495 | 90.54952 | 0.0945  | 0.00489 |
| pilus assembly                                | 68  | 1.42787 | 1 | 0.0205  | 5.0171   | 40.36458 | 104 | 0.38812 | 94.9829  | 0.05017 | 0.00587 |
| bacterioferritin-<br>associated<br>ferredoxin | 83  | 1.57944 | 1 | 0.04131 | 10.19322 | 21.83991 | 60  | 0.364   | 89.80678 | 0.10193 | 0.0088  |
| hypothetical                                  | 106 | 1.12424 | 1 | 0.08617 | 28.00396 | 4.20909  | 19  | 0.22153 | 71.99604 | 0.28004 | 0.01271 |
| hypothetical                                  | 93  | 1.2578  | 1 | 0.0515  | 13.77617 | 11.28274 | 35  | 0.32236 | 86.22383 | 0.13776 | 0.01369 |
| hypothetical                                  | 103 | 0.77778 | 1 | 0.0829  | 41.97802 | 1.83333  | 16  | 0.11458 | 58.02198 | 0.41978 | 0.01955 |
| hypothetical                                  | 14  | 1.17481 | 1 | 0.02233 | 5.70849  | 30.61343 | 83  | 0.36884 | 94.29151 | 0.05708 | 0.02248 |
| hypothetical                                  | 95  | 1.07285 | 1 | 0.04494 | 10.01194 | 20.19638 | 50  | 0.40393 | 89.98806 | 0.10012 | 0.02346 |
| hypothetical                                  | 36  | 1.12041 | 1 | 0.01635 | 4.41472  | 35.03801 | 99  | 0.35392 | 95.58528 | 0.04415 | 0.02444 |
| preprotein<br>translocase                     | 17  | 1.10038 | 1 | 0.02158 | 5.85192  | 29.85417 | 86  | 0.34714 | 94.14808 | 0.05852 | 0.0303  |

|                                                                    |     |         |   |          |          |          |     |         |          |          |         |
|--------------------------------------------------------------------|-----|---------|---|----------|----------|----------|-----|---------|----------|----------|---------|
| Diguanylate<br>phosphodiesterase<br>(transcriptional<br>regulator) | 12  | 0.9648  | 1 | 0.0157   | 3.79557  | 33.0352  | 83  | 0.39801 | 96.20443 | 0.03796  | 0.03715 |
| hypothetical                                                       | 118 | 1.04167 | 1 | 0.09773  | 20.82627 | 4.45833  | 12  | 0.37153 | 79.17373 | 0.20826  | 0.04301 |
| antitoxin                                                          | 72  | 0.90714 | 1 | 0.45     | 90       | 0.95     | 19  | 0.05    | 10       | 0.9      | 0.11144 |
| hypothetical                                                       | 13  | 0.60583 | 1 | 0.0077   | 2.29196  | 27.22947 | 83  | 0.32807 | 97.70804 | 0.02292  | 0.11339 |
| toxin-antitoxin<br>system                                          | 19  | 0.39    | 1 | 0.00831  | 4.17594  | 9.15     | 48  | 0.19062 | 95.82406 | 0.04176  | 0.15934 |
| transcriptional<br>regulator                                       | 100 | 0.55655 | 1 | 0.0126   | 3.17731  | 9.97917  | 26  | 0.38381 | 96.82269 | 0.03177  | 0.17889 |
| transcriptional<br>regulator                                       | 9   | 0.24809 | 1 | 0.00528  | 4.41481  | 5.82738  | 51  | 0.11426 | 95.58519 | 0.04415  | 0.22287 |
| hypothetical                                                       | 116 | 0.44444 | 1 | 0.03472  | 17.24138 | 2.66667  | 16  | 0.16667 | 82.75862 | 0.17241  | 0.23949 |
| osmotically<br>inducible protein                                   | 86  | 0.27242 | 1 | 0.00119  | 0.55555  | 22.07664 | 104 | 0.21228 | 99.44445 | 0.00556  | 0.24536 |
| hypothetical                                                       | 74  | 0.31837 | 1 | 0.00638  | 2.44807  | 8.89785  | 35  | 0.25422 | 97.55193 | 0.02448  | 0.25709 |
| hypothetical                                                       | 92  | 0.41224 | 1 | 0.00353  | 1.02273  | 16.05714 | 47  | 0.34164 | 98.97727 | 0.01023  | 0.26295 |
| hypothetical                                                       | 18  | 0.02484 | 1 | 0.00036  | 3.27456  | 0.96429  | 90  | 0.01071 | 96.72544 | 0.03275  | 0.3001  |
| methionine<br>metabolism                                           | 4   | 0.22133 | 1 | 0.00041  | 0.20129  | 20.88244 | 104 | 0.20079 | 99.79871 | 0.00201  | 0.32063 |
| toxin-antitoxin<br>system                                          | 21  | 0.04586 | 1 | -0.00013 | -0.24652 | 4.78571  | 93  | 0.05146 | 100.2465 | -0.00247 | 0.39687 |
| hypothetical                                                       | 127 | 0.65    | 1 | 0.25     | 50       | 0.75     | 3   | 0.25    | 50       | 0.5      | 0.39883 |
| multi-drug<br>resistance                                           | 123 | 0.58333 | 1 | 0.16667  | 33.33333 | 0.66667  | 2   | 0.33333 | 66.66667 | 0.33333  | 0.50831 |

|                                             |     |         |   |          |          |          |    |         |          |          |         |
|---------------------------------------------|-----|---------|---|----------|----------|----------|----|---------|----------|----------|---------|
| membrane<br>protein                         |     |         |   |          |          |          |    |         |          |          |         |
| pilus assembly                              | 46  | 0.16855 | 1 | -0.00321 | -1.05249 | 26.46782 | 86 | 0.30777 | 101.0525 | -0.01052 | 0.60704 |
| hypothetical                                | 45  | 0.16825 | 1 | -0.00346 | -1.09316 | 27.82051 | 87 | 0.31978 | 101.0932 | -0.01093 | 0.62854 |
| biofilm<br>formation                        | 96  | 0.0375  | 1 | -0.07143 | -71.4286 | 2.4      | 14 | 0.17143 | 171.4286 | -0.71429 | 1       |
| conjugation<br>protein                      | 125 | 0       | 1 | -0.25    | -100     | 1        | 2  | 0.5     | 200      | -1       | 1       |
| putative<br>arabinose efflux<br>transporter | 169 | 0.08333 | 1 | -0.16667 | -100     | 0.66667  | 2  | 0.33333 | 200      | -1       | 1       |
